1 **Title:**

2 A simple, high-throughput method of protein and label removal from extracellular vesicle samples

3  
4 **Affiliation:**

5 Joshua A. Welsh<sup>1\*</sup>, Bryce Killingsworth<sup>1</sup>, Julia Kepley<sup>1</sup>, Tim Traynor<sup>1</sup>, Kathy McKinnon<sup>2</sup>, Jason  
6 Savage<sup>1</sup>, Deven Appel<sup>1</sup>, Kenneth Aldape<sup>3</sup>, Kevin Camphausen<sup>4</sup>, Jay A. Berzofsky<sup>2</sup>, Alexander R.  
7 Ivanov<sup>5</sup>, Ionita H. Ghiran<sup>6</sup>, Jennifer C. Jones<sup>1\*</sup>

8  
9 <sup>1</sup> Translational Nanobiology Section, Laboratory of Pathology, Center for Cancer Research, National Cancer Institute,  
10 National Institutes of Health, Bethesda, MD, USA. <sup>2</sup> Vaccine Branch, Center for Cancer Research, National Cancer  
11 Institute, National Institutes of Health, Bethesda, MD, USA. <sup>3</sup> Laboratory of Pathology, Center for Cancer Research,  
12 National Cancer Institute, National Institutes of Health, Bethesda, MD, USA. <sup>4</sup> Radiation Oncology Branch, Center for  
13 Cancer Research, National Cancer Institute, National Institutes of Health, Bethesda, MD, USA. <sup>5</sup> Barnett Institute of  
14 Chemical and Biological Analysis, Department of Chemistry and Chemical Biology, Northeastern University, 360  
15 Huntington Ave., Boston, MA, 02115, USA. <sup>6</sup> Department of Medicine, Beth Israel Deaconess Medical Center, Harvard  
16 Medical School, Boston, MA, USA

17  
18  
19 **Conflict of Interest**

20 JAW and JCJ are co-inventors of related NCI IP (NIH Ref. No. E-227-2017 , PCT/US2018/067913).

21  
22 **Acknowledgements**

23 Research for this manuscript was supported by NIH U01 HL126497, NIH R01 CA218500, NIH UG3 TR002881, NIH ZIA  
24 BC011502, NIH R01 GM120272, NIH R35 GM136421, and NIH ZIA BC011503.

25  
26

## 27 **Abstract**

28 Evidence continues to increase of the clinical utility extracellular vesicles (EVs) can provide as translational biomarkers.  
29 While a wide variety of EV isolation and purification methods have been implemented, few techniques are high-throughput  
30 and scalable for removing excess fluorescent reagents (e.g. dyes, antibodies). EVs are too small to be recovered from  
31 routine cell-processing procedures, such as filtration or centrifugation. The lack of suitable methods for removing unbound  
32 labels, especially in optical assays, is a major roadblock to accurate EV phenotyping and utilization of EV assays in a  
33 translational or clinical setting. Therefore, we developed a method for using a multi-modal resin, referred to as EV-Clean,  
34 to remove unbound labels from EV samples, and we demonstrate improvement in flow cytometric EV analysis with the  
35 use of this EV-Clean method.

## 37 **Introduction**

38 Exosomes and ectosomes are small lipid packages released from cells, here referred to under the umbrella term of  
39 extracellular vesicles (EVs)<sup>1,2</sup>. The majority of EVs have been demonstrated to be  $\leq 100$  nm in diameter, with a Power-law  
40 distribution ranging from  $\sim 25$ - $\rightarrow 1000$  nm<sup>3-5</sup>. EVs hold prospect as clinical biomarkers due to their surface and luminal  
41 cargo, hypothesized to offer a retrospective snapshot of their parent cell upon their release. Due to their small surface  
42 area, the majority of EVs typically express a very low number of copies of any one protein. Current estimates using high-  
43 sensitivity, calibrated measurements suggest the majority of EVs express  $\leq 10$  protein copies of a protein<sup>5,6</sup>. This small  
44 size and limit cargo makes isolation, purification, and detection of EVs challenging.

46 In the most recently reported ISEV survey, which included 196 participants from 30 countries, the most reported EV  
47 isolation methods included: ultracentrifugation, density gradient, filtration, size-exclusion chromatography, precipitation,  
48 and magnetic bead capture<sup>7,8</sup>. Despite, a wide variety of techniques being utilized to date for EV isolation, a gold-  
49 standard, or general consensus, is yet to emerge<sup>9</sup>. One of the main drawbacks of the current methodologies is their lack  
50 of high-throughput compatibility, with many techniques being labor intensive and time consuming<sup>4, 10-12</sup>. Isolation  
51 procedures implemented are also dependent on factors such as, the type of medium e.g. plasma, cell culture, the volume  
52 of medium e.g.  $\mu$ L to L, the downstream analysis technique e.g. single-particle methods or bulk methods, and the scale of  
53 isolation e.g. a couple of samples to hundreds of samples.

55 A wide variety of detection methods have been utilized for characterizing single EVs<sup>5,6, 13-18</sup>. A common analysis  
56 technique of interest for translation studies is EV flow cytometry (EV-FC)<sup>6, 19</sup>. EV-FC has been utilized in a number of  
57 forms with some commercially available flow cytometers capable of detecting single-fluorescent molecules<sup>20</sup>. This kind of

58 sensitivity is required to detect limited surface epitope expression due to surface area on the smallest EVs<sup>21</sup>. With  
59 instrumentation capable of detecting single-fluorescent molecule, it has become critical that residual or unbound  
60 fluorophore is removed from samples prior to analysis. The removal of residual or unbound fluorophore is also a highly  
61 recommended step for conventional EV-FC with lower sensitivity instrumentation as a means to increase the signal to  
62 noise ratio, and remove artefactual populations<sup>22-24</sup>. For this reason, the MIFlowCyt-EV reporting framework; published as  
63 a position paper to help standardize reporting of single EV flow cytometry experiments, has specific fields to demonstrate  
64 labels are not contributing or being included in EV analysis<sup>25</sup>. Other techniques relying on fluorescence reagents,  
65 particularly for membrane labeling, such as microscopy also require wash steps<sup>5, 26</sup>.

66  
67 Currently, there is a gap in EV isolation and purification methods for removal of residual or unbound fluorescent labels that  
68 can be applied in a high-throughput format to small volumes, which would retain EV yield without drastically reducing  
69 sample concentration. While it is possible to titrate antibodies and fluorescent dyes to EVs for high-throughput clinical  
70 sample analysis, where samples may be in limited supply, it is neither fast, practical, or cost-effective. Here, we  
71 demonstrate EV-Clean as a simple, high-throughput method of EV purification from residual proteins and unbound  
72 fluorescent-antibodies, which can be used with  $\mu$ L volumes, with a limited reduction in concentration and does not  
73 fractionate EVs into several samples, that is associated with widely used size exclusion methods.

## 74 75 **Materials & Methods**

### 76 ***Blood collection & ethics***

77 A blood samples were obtained using EDTA collection tubes. All analyses were performed in a deidentified manner, with  
78 IRB-approved NIH intramural protocol number 02-C-0064. Plasma samples were depleted of cells and platelets by two  
79 centrifugation steps at 2500 x g at room temperature in a swing-out bucket rotor for 15 minutes with the supernatant  
80 isolated. Platelet-poor plasma samples were then stored in low-protein binding tubes (Thermo Fisher Scientific, Waltham,  
81 USA) at -80°C. Samples were thawed at 37°C for 10 minutes before being used in downstream experiments.

### 82 83 ***Cell culture***

84 The immature dendritic cell line DC2.4 was kindly provided by Kenneth Rock (University of Massachusetts Medical  
85 School, Boston, MA) and cultured in phenol red-free RPMI1640 medium supplemented with 10% FBS, 1% L-  
86 glutamine, 1% penicillin-streptomycin and 0.1%  $\beta$ -mercaptoethanol (ThermoFisher). For EV-depleted medium  
87 preparation, 20% FBS containing RPMI was ultracentrifuged for 18 hours at 100,000 g at 4°C in a 45Ti fixed angle  
88 rotor using polycarbonate tubes (both from Beckman Coulter). After ultracentrifugation, the top 50 mL of medium

suspension were harvested, filtered with 0.2  $\mu\text{m}$  PES filter bottles and stored at 4  $^{\circ}\text{C}$ . Before using for culture, RPMI and L-glutamine, Penicillin-streptomycin and  $\beta$ -mercaptoethanol were added, to achieve the concentrations before mentioned above. To produce DC2.4-derived EVs, cells were cultured for 2–3 days in EV-depleted medium and supernatants harvested before confluence was reached. Supernatants were first depleted of cells, debris and apoptotic bodies by centrifuging at 2500 g for 15 minutes twice. Supernatants were added to 100 kDa Pall Jumbosep concentrators until 5 mL of the harvested supernatant remained. 250  $\mu\text{L}$  of DPBS was added to 250  $\mu\text{L}$  of concentrated EVs. This 500  $\mu\text{L}$  mixture was then loaded onto a qEV Original column with fractions 6-12 collected separately. Each were analysed using Nanosight and run on an SDS-PAGE gel to confirm presence of vesicles, before fractions 8 and 9 were combined for downstream experiments.

### **BSA measurements**

BSA concentration were measured using a NanoDrop 2000 Spectrometer (Thermo Fisher Scientific, USA). Prior to recording concentration using the NanoDrop, the sensor was rinsed with deionized water and dried with a cotton bud before a baseline reading was taken using DPBS. 2  $\mu\text{L}$  of sample was then placed on the sensor and a concentration reading was recorded three times. Recordings were exported to .xml files. Data was plotted using Prism (v8.0.1, GraphPad Software, San Diego, USA).

### **SDS Page**

A 10% Tris/Glycine/SDS Buffer solution was prepared with 100 mL buffer (Bio-Rad) in 900 mL tissue culture grade water. 10  $\mu\text{L}$  of Bio-Rad Precision Plus ladder were added to Bio-Rad Mini-PROTEAN TGX gels (10- or 15-well). For the neat plasma samples, 15, 10, or 5  $\mu\text{L}$  of plasma was added to 8.25  $\mu\text{L}$  4x Laemmli Sample Buffer (Bio-Rad, 161-0747) and 0.75  $\mu\text{L}$  55 mM 2-mercaptoethanol (Gibco, 21985). The entirety (24, 19, or 14  $\mu\text{L}$ ) of the sample was added to the wells of the gel. For the samples that had been previously incubated with EV-Clean, 15, 10, or 5  $\mu\text{L}$  of purified sample was added to 8.25  $\mu\text{L}$  4x Laemmli Sample Buffer and 0.75  $\mu\text{L}$  55 mM 2-mercaptoethanol. The entirety (24, 19, or 14  $\mu\text{L}$ ) of the mixture was added to the wells of the gel. Antibody removal was tested by suspending 0.5  $\mu\text{g}$  of IgG-PE-CD147 (BioLegend, Cat. 306212) and IgG-APC-CD147 (BioLegend, Cat. 306214) in a final volume of 50  $\mu\text{L}$  adding to 100  $\mu\text{L}$  of EV-Clean for 30 minutes. Post-incubation 20  $\mu\text{L}$  of supernatant was added to 8.25  $\mu\text{L}$  4x Laemmli Sample Buffer (Bio-Rad, 161-0747), 0.75  $\mu\text{L}$  55 mM 2-mercaptoethanol (Gibco, 21985), and 20  $\mu\text{L}$  of SDS buffer. The final volume of 50  $\mu\text{L}$  was added to each well of a 10 well Bio-Rad Mini-PROTEAN TGX gel.

19 With a Mini-PROTEAN Tetra System connected to a Bio-Rad Power Pac 1000, SDS-PAGE was run at a constant voltage  
20 of 200 V until the bands ran off the bottom of the gels. The stain-free gel was activated and imaged under the Bio-Rad  
21 ChemiDoc Touch Imaging System. Gels were analysed using Image Lab software (v6.0.1, Bio-Rad, Hercules, USA)

### 22 23 ***Nanoparticle Tracking Analysis (NTA)***

24 Particle concentration and diameter distribution were characterized by NTA with a NanoSight LM10 instrument  
25 (Malvern, UK), equipped with a 405 nm LM12 module and EMCCD camera (DL-658-OEM-630, Andor). Video  
26 acquisition was performed with NTA software v3.2, using a camera level of 14. Three 30 second videos were  
27 captured per sample. Post-acquisition video analysis used the following settings: minimum track length = 5, detection  
28 threshold = 4, automatic blur size = 2-pass, maximum jump size = 12.0. Exported datasets were compiled and plotted  
29 using scripts written in MATLAB v9.3.0 (The MathWorks Inc., USA). Samples were diluted to have a concentration in the  
30 region of  $1 \times 10^8$  to  $1 \times 10^9$  particles  $\text{mL}^{-1}$ .

### 31 32 ***BSA removal using EV-Clean***

33 Samples containing approximately 400  $\mu\text{g}$  of BSA diluted in 75  $\mu\text{L}$  DPBS were aliquoted into PCR tubes containing 100  
34  $\mu\text{L}$  of DPBS-washed CptoCore -700 or -400 (GE Biosciences) Samples were incubated at 4 °C for 30 minutes before  
35 the top 75  $\mu\text{L}$  of supernatant was then removed and added to another 100  $\mu\text{L}$  of DPBS-washed EV-Clean, mixed, and  
36 incubated for a further 30 minutes at 4 °C.

### 37 38 ***Plasma protein removal using EV-Clean***

39 15, 10, and 5  $\mu\text{L}$  of platelet-poor plasma was aliquoted into PCR tubes containing 100  $\mu\text{L}$  of DPBS-washed EV-Clean.  
40 Samples were incubated at 4 °C for 30 minutes before the top 15, 10, or 5  $\mu\text{L}$  of supernatant was then removed and  
41 added to another 100  $\mu\text{L}$  of DPBS-washed EV-Clean, mixed, and incubated for a further 30 minutes at 4 °C.

### 42 43 ***EV CFSE-labeling***

44 CFSE-labelling of DC2.4 EVs was carried out as described previously<sup>27</sup>. Briefly, 15  $\mu\text{L}$  of  $1 \times 10^9$  DC2.4 EVs, pooled from  
45 qEV original columns fraction 8 and 9, were added to 15  $\mu\text{L}$  of 40  $\mu\text{M}$  of CFDA-SE (Thermo Fisher Scientific). This was  
46 protected from light and incubated at 37 °C for 2 hours. 70  $\mu\text{L}$  of DPBS was added to the stained sample. This was  
47 repeated for each sample. Excess dye removal using size-exclusion chromatography used NAP-5 columns, loading 100  
48  $\mu\text{L}$  of CFSE-stained EVs and collecting fractions 3 and 4 for purified EVs, having a final volume of 500  $\mu\text{L}$ . For dye  
49 removal using EV-Clean, 100  $\mu\text{L}$  of CFSE-stained EVs were added to 100  $\mu\text{L}$  of DPBS-washed EV-Clean in a PCR tube,

50 mixed, and incubated at 4 °C for 30 minutes. The top 100 µL of supernatant was then removed and added to another 100  
51 µL of DPBS-washed EV-Clean, mixed, and incubated for a further 30 minutes at 4 °C. Post-dye removal all samples were  
52 transferred to 1.5 mL low protein binding tubes (Thermo Fisher Scientific) with  $1 \times 10^9$  200 nm Red FluoSpheres (Thermo  
53 Fisher Scientific) added, before being diluted to a final volume of 1 mL for analysis by nanoFACS.

### 54

### 55 **Flow Cytometry of EVs**

56 Flow cytometric analysis of CFSE EVs was carried out using previously published NanoFACS methodology<sup>27</sup>. Briefly,  
57 an Astrios EQ jet-in-air system (Beckman Coulter), configured with 5 lasers (355, 405, 488, 561 and 640 nm  
58 wavelength), where SSC can be detected and used as a trigger at laser wavelength with the exception of the 355 nm  
59 laser. EV analyses were carried out using a 561-SSC trigger with the 561-SSC voltage and threshold settings  
60 adjusted to allow ~10,000 events of background reference noise per second. Samples were loaded and run for  
61 5 minutes until the event rate was stable, and then recorded for 30 seconds. All samples were run at a 0.2 psi  
62 differential pressure, monitoring stability closely. Data was acquired using Summit v6 (Beckman Coulter) and  
63 analyzed with FlowJo v10.1r5 (TreeStar, USA). CFSE fluorescence data was calibrated using FITC MESF calibration  
64 beads using FCM<sub>PASS</sub> software (v.3.03)<sup>28, 29</sup>. Full calibration details can be found in the MIFlowCyt-EV report,  
65 **Supplementary Information 1**<sup>25</sup>. Flow cytometric analysis of EV recovery was carried out using a Cytex Aurora  
66 (Cytex Biosciences), configured with 4 lasers (405, 488, 561, 640 nm) with a custom modified 405 nm detector.  
67 Diameter was calculated for EVs using FCM<sub>PASS</sub> software (v3.03)<sup>28</sup>. Light scatter parameters were calibrated into full  
68 calibration details can be found in the MIFlowCyt-EV report, **Supplementary Information 2**<sup>25</sup>.

### 69

### 70 **Results**

71 Optimal incubation times for protein removal were tested with bovine serum albumin (BSA). These showed that 30  
72 minutes and 1-hour incubation had minor differences, **Figure 1**. After a single incubation with EV-Clean the BSA content  
73 dropped from ~400 µg to ~70 and ~60 µg, respectively, **Figure 1**. A 4-hour single incubation showed a decrease from  
74 ~400 µg to no detectable BSA. To determine whether a second, sequential incubation could speed up this process, the  
75 use of an additional 30-minute incubation was tested after each of the first incubations. After the second incubation no  
76 detectable BSA was observed after any of the preceding incubation times. We therefore conclude that two 30-minute  
77 incubation are sufficient as an incubation period to work from.

78

79 The ability of EV-Clean to remove the large amount of soluble protein from a heterogeneous solution was tested using  
80 plasma samples with the effects of purification observed by SDS-PAGE, **Figure 2**. 15 µL of plasma after a single 30-

minute incubation with EV-Clean shows a significantly reduced signal when compared to neat plasma. This reduction in protein content shows no observable bias in protein size with all observable protein  $\leq 300$  kDa showing depletion. A second incubation again further depletes all observable protein with only faint bands visible at ~13, 50, 65, 185, 311 kDa. This was repeated for 10  $\mu$ L and 5  $\mu$ L of plasma. With 5  $\mu$ L of plasma bands are only faint bands were only visible at ~50 and 311 kDa indicating the majority of small proteins can be depleted from plasma with 100  $\mu$ L of EV-Clean and two 30-minute incubations.

EV-Clean was next tested for its ability to remove fluorescently-conjugated IgG antibodies. R-phycoerythrin (R-PE) and allophycocyanin (APC) were chosen due to their large size, 250 and 105 kDa, respectively. Both R-PE-IgG1 and APC-IgG1 were significantly depleted when incubated with EV-Clean, **Figure 3A**. Along with antibodies, molecular labels are used for staining EVs. The ability of EV-Clean to remove excess CFSE from stained EV samples compared to a previously published method using size exclusion chromatography (SEC) using nanoFACS. The instrument reference noise, measured with PBS and unstained EVs, had a median brightness of 48-49 fluorescein (FITC) molecules of equivalent soluble fluorophore (MESF) units. EVs without the removal of excess CFSE label resulted in the cytometer noise being raised to a median brightness of 437 FITC MESF units, **Figure 3B**. By removing the excess CFSE, the noise level remained low with the SEC and EV-Clean purification methods having a median brightness of 58 and 54 FITC MESF units, respectively, **Figure 3B**.

Finally, the affect of EV-Clean on the detectable EV concentration after removing unbound label was evaluated, **Figure 4**. Recovery was assessed by gating single EVs between 115 to 200 nm, **Figure 4A**. After one incubation of EV-Clean the detectable recovery was 75%, with a subsequent reduction after a second incubation to 51%. In summary, the use of EV-Clean demonstrates a 75% EV recovery after each incubation and >95% label removal, without dilution, for each incubation.

## Discussion

We have demonstrated that EV-Clean is able to significantly deplete soluble proteins from heterogeneous samples such as plasma in a form-factor that is compatible with 96-well plates and robotics. This methodology requires up to just two 30-minute incubations to achieve significant protein-depletion. Furthermore, we have demonstrated that the detectable EV concentration using flow cytometry is ~75% using EV-clean, making it a useful tool for EV-isolation from heterogenous samples containing many soluble proteins. Due EV-clean protein removal being a multi-mode process of intercalation and affinity capture, it is possible that EV recovery is higher in samples containing more proteins than the size-exclusion



purified samples that were tested. We have also demonstrated the use of EV-Clean for EV-labelling is beneficial for high-sensitivity analysis techniques, such as flow cytometry, where the removal of excess label can reduce sensitivity and several samples need to be prepared simultaneously. While this proposed method offers potential for relatively small volume, high-throughput purification applications, it may be less suitable for large volume applications such as tissue culture supernatants.

Future development of EV-Clean as a reliable purification method for heterogeneous samples, such as plasma, will require additions to also deplete large and abundant particles, such as lipoproteins, that could confound EV data after soluble-protein removal. Consistent packing and receptacle formats are also required to ensure consistent results, as is the case for size-exclusion chromatography methods.

## References

1. Thery, C.; Witwer, K. W.; Aikawa, E.; Alcaraz, M. J.; Anderson, J. D.; Andriantsitohaina, R.; Antoniou, A.; Arab, T.; Archer, F.; Atkin-Smith, G. K.; Ayre, D. C.; Bach, J. M.; Bachurski, D.; Baharvand, H.; Balaj, L.; Baldacchino, S.; Bauer, N. N.; Baxter, A. A.; Bebawy, M.; Beckham, C.; Bedina Zavec, A.; Benmoussa, A.; Berardi, A. C.; Bergese, P.; Bielska, E.; Blenkiron, C.; Bobis-Wozowicz, S.; Boilard, E.; Boireau, W.; Bongiovanni, A.; Borrás, F. E.; Bosch, S.; Boulanger, C. M.; Breakefield, X.; Breglio, A. M.; Brennan, M. A.; Brigstock, D. R.; Brisson, A.; Broekman, M. L.; Bromberg, J. F.; Bryl-Gorecka, P.; Buch, S.; Buck, A. H.; Burger, D.; Busatto, S.; Buschmann, D.; Bussolati, B.; Buzas, E. I.; Byrd, J. B.; Camussi, G.; Carter, D. R.; Caruso, S.; Chamley, L. W.; Chang, Y. T.; Chen, C.; Chen, S.; Cheng, L.; Chin, A. R.; Clayton, A.; Clerici, S. P.; Cocks, A.; Cocucci, E.; Coffey, R. J.; Cordeiro-da-Silva, A.; Couch, Y.; Coumans, F. A.; Coyle, B.; Crescitelli, R.; Criado, M. F.; D'Souza-Schorey, C.; Das, S.; Datta Chaudhuri, A.; de Candia, P.; De Santana, E. F.; De Wever, O.; Del Portillo, H. A.; Demaret, T.; Deville, S.; Devitt, A.; Dhondt, B.; Di Vizio, D.; Dieterich, L. C.; Dolo, V.; Dominguez Rubio, A. P.; Dominici, M.; Dourado, M. R.; Driedonks, T. A.; Duarte, F. V.; Duncan, H. M.; Eichenberger, R. M.; Ekstrom, K.; El Andaloussi, S.; Elie-Caille, C.; Erdbrugger, U.; Falcon-Perez, J. M.; Fatima, F.; Fish, J. E.; Flores-Bellver, M.; Forsonits, A.; Frelet-Barrand, A.; Fricke, F.; Fuhrmann, G.; Gabrielsson, S.; Gamez-Valero, A.; Gardiner, C.; Gartner, K.; Gaudin, R.; Gho, Y. S.; Giebel, B.; Gilbert, C.; Gimona, M.; Giusti, I.; Goberdhan, D. C.; Gorgens, A.; Gorski, S. M.; Greening, D. W.; Gross, J. C.; Gualerzi, A.; Gupta, G. N.; Gustafson, D.; Handberg, A.; Haraszti, R. A.; Harrison, P.; Hegyesi, H.; Hendrix, A.; Hill, A. F.; Hochberg, F. H.; Hoffmann, K. F.; Holder, B.; Holthofer, H.; Hosseinkhani, B.; Hu, G.; Huang, Y.; Huber, V.; Hunt, S.; Ibrahim, A. G.; Ikezu, T.; Inal, J. M.; Isin, M.; Ivanova, A.; Jackson, H. K.; Jacobsen, S.; Jay, S. M.; Jayachandran, M.; Jenster, G.; Jiang, L.; Johnson, S. M.; Jones, J. C.; Jong, A.; Jovanovic-Talisman, T.; Jung, S.; Kalluri, R.; Kano, S. I.; Kaur, S.; Kawamura, Y.; Keller, E. T.; Khamari, D.; Khomyakova, E.; Khvorova, A.; Kierulf, P.; Kim, K. P.; Kislinger, T.; Klingeborn, M.; Klinke, D. J., 2nd; Kornek, M.; Kosanovic, M. M.; Kovacs, A. F.; Kramer-Albers, E. M.; Krasemann, S.; Krause, M.; Kurochkin, I. V.; Kusuma, G. D.; Kuypers, S.; Laitinen, S.; Langevin, S. M.; Languino, L. R.; Lannigan, J.; Lasser, C.; Laurent, L. C.; Lavieu, G.; Lazaro-Ibanez, E.; Le Lay, S.; Lee, M. S.; Lee, Y. X. F.; Lemos, D. S.; Lenassi, M.; Leszczynska, A.; Li, I. T.; Liao, K.; Libregts, S. F.; Ligeti, E.; Lim, R.; Lim, S. K.; Line, A.; Linnemannstons, K.; Llorente, A.; Lombard, C. A.; Lorenowicz, M. J.; Lorincz, A. M.; Lotvall, J.; Lovett, J.; Lowry, M. C.; Loyer, X.; Lu, Q.; Lukomska, B.; Lunavat, T. R.; Maas, S. L.; Malhi, H.; Marcilla, A.; Mariani, J.; Mariscal, J.; Martens-Uzunova, E. S.; Martin-Jaular, L.; Martinez, M. C.; Martins, V. R.; Mathieu, M.; Mathivanan, S.; Maugeri, M.; McGinnis, L. K.; McVey, M. J.; Meckes, D. G., Jr.; Meehan, K. L.; Mertens, I.; Minciocchi, V. R.; Moller, A.; Moller Jorgensen, M.; Morales-Kastresana, A.; Morhayim, J.; Mullier, F.; Muraca, M.; Musante, L.; Mussack, V.; Muth, D. C.; Myburgh, K. H.; Najrana, T.; Nawaz, M.; Nazarenko, I.; Nejsum, P.; Neri, C.; Neri, T.; Nieuwland, R.; Nimrichter, L.; Nolan, J. P.; Nolte-'t Hoen, E. N.; Noren Hooten, N.; O'Driscoll, L.; O'Grady, T.; O'Loghlen, A.; Ochiya, T.; Olivier, M.; Ortiz, A.; Ortiz, L. A.; Osteikoetxea, X.; Ostergaard, O.; Ostrowski, M.; Park, J.; Pegtel, D. M.; Peinado, H.; Perut, F.; Pfaffl, M. W.; Phinney, D. G.; Pieters, B. C.; Pink, R. C.; Pisetsky, D. S.; Pogge von Strandmann, E.; Polakovicova, I.; Poon, I. K.; Powell, B. H.; Prada, I.; Pulliam, L.; Quesenberry, P.; Radeghieri, A.; Raffai, R. L.; Raimondo, S.; Rak, J.; Ramirez, M. I.; Raposo, G.; Rayyan, M. S.; Regev-Rudzki, N.; Ricklefs, F. L.; Robbins, P. D.; Roberts, D. D.; Rodrigues, S. C.; Rohde, E.; Rome, S.; Rouschop, K. M.; Rugghetti, A.; Russell, A. E.; Saa, P.; Sahoo, S.; Salas-Huenuleo, E.; Sanchez, C.; Saugstad, J. A.; Saul, M. J.; Schiffelers, R. M.; Schneider, R.; Schoyen, T. H.; Scott, A.; Shahaj, E.; Sharma, S.; Shatnyeva, O.; Shekari, F.; Shelke, G. V.; Shetty, A. K.; Shiba, K.;



- Siljander, P. R.; Silva, A. M.; Skowronek, A.; Snyder, O. L., 2nd; Soares, R. P.; Sodar, B. W.; Soekmadji, C.; Sotillo, J.; Stahl, P. D.; Stoorvogel, W.; Stott, S. L.; Strasser, E. F.; Swift, S.; Tahara, H.; Tewari, M.; Timms, K.; Tiwari, S.; Tixeira, R.; Tkach, M.; Toh, W. S.; Tomasini, R.; Torrecilhas, A. C.; Tosar, J. P.; Toxavidis, V.; Urbanelli, L.; Vader, P.; van Balkom, B. W.; van der Grein, S. G.; Van Deun, J.; van Herwijnen, M. J.; Van Keuren-Jensen, K.; van Niel, G.; van Royen, M. E.; van Wijnen, A. J.; Vasconcelos, M. H.; Vechetti, I. J., Jr.; Veit, T. D.; Vella, L. J.; Velot, E.; Verweij, F. J.; Vestad, B.; Vinas, J. L.; Visnovitz, T.; Vukman, K. V.; Wahlgren, J.; Watson, D. C.; Wauben, M. H.; Weaver, A.; Webber, J. P.; Weber, V.; Wehman, A. M.; Weiss, D. J.; Welsh, J. A.; Wendt, S.; Wheelock, A. M.; Wiener, Z.; Witte, L.; Wolfram, J.; Xagorari, A.; Xander, P.; Xu, J.; Yan, X.; Yanez-Mo, M.; Yin, H.; Yuana, Y.; Zappulli, V.; Zarubova, J.; Zekas, V.; Zhang, J. Y.; Zhao, Z.; Zheng, L.; Zheutlin, A. R.; Zickler, A. M.; Zimmermann, P.; Zivkovic, A. M.; Zocco, D.; Zuba-Surma, E. K., Minimal information for studies of extracellular vesicles 2018 (MISEV2018): a position statement of the International Society for Extracellular Vesicles and update of the MISEV2014 guidelines. *J Extracell Vesicles* **2018**, *7* (1), 1535750.
2. Lotvall, J.; Hill, A. F.; Hochberg, F.; Buzas, E. I.; Di Vizio, D.; Gardiner, C.; Ghossein, Y. S.; Kurochkin, I. V.; Mathivanan, S.; Quesenberry, P.; Sahoo, S.; Tahara, H.; Wauben, M. H.; Witwer, K. W.; Thery, C., Minimal experimental requirements for definition of extracellular vesicles and their functions: a position statement from the International Society for Extracellular Vesicles. *J Extracell Vesicles* **2014**, *3*, 26913.
3. van der Pol, E.; Coumans, F. A.; Grootemaat, A. E.; Gardiner, C.; Sargent, I. L.; Harrison, P.; Sturk, A.; van Leeuwen, T. G.; Nieuwland, R., Particle size distribution of exosomes and microvesicles determined by transmission electron microscopy, flow cytometry, nanoparticle tracking analysis, and resistive pulse sensing. *J Thromb Haemost* **2014**, *12* (7), 1182-92.
4. Tian, Y.; Gong, M.; Hu, Y.; Liu, H.; Zhang, W.; Zhang, M.; Hu, X.; Aubert, D.; Zhu, S.; Wu, L.; Yan, X., Quality and efficiency assessment of six extracellular vesicle isolation methods by nano-flow cytometry. *J Extracell Vesicles* **2020**, *9* (1), 1697028.
5. Lennon, K. M.; Wakefield, D. L.; Maddox, A. L.; Brehove, M. S.; Willner, A. N.; Garcia-Mansfield, K.; Meechoovet, B.; Reiman, R.; Hutchins, E.; Miller, M. M.; Goel, A.; Pirrotte, P.; Van Keuren-Jensen, K.; Jovanovic-Talisman, T., Single molecule characterization of individual extracellular vesicles from pancreatic cancer. *J Extracell Vesicles* **2019**, *8* (1), 1685634.
6. Tian, Y.; Ma, L.; Gong, M.; Su, G.; Zhu, S.; Zhang, W.; Wang, S.; Li, Z.; Chen, C.; Li, L.; Wu, L.; Yan, X., Protein Profiling and Sizing of Extracellular Vesicles from Colorectal Cancer Patients via Flow Cytometry. *Acs Nano* **2018**, *12* (1), 671-680.
7. Gardiner, C.; Di Vizio, D.; Sahoo, S.; Thery, C.; Witwer, K. W.; Wauben, M.; Hill, A. F., Techniques used for the isolation and characterization of extracellular vesicles: results of a worldwide survey. *Journal of Extracellular Vesicles* **2016**, *5*.
8. Consortium, E.-T.; Van Deun, J.; Mestdagh, P.; Agostinis, P.; Akay, O.; Anand, S.; Anckaert, J.; Martinez, Z. A.; Baetens, T.; Beghein, E.; Bertier, L.; Berx, G.; Boere, J.; Boukouris, S.; Bremer, M.; Buschmann, D.; Byrd, J. B.; Casert, C.; Cheng, L.; Cmoch, A.; Daveloose, D.; De Smedt, E.; Demirsoy, S.; Depoorter, V.; Dhondt, B.; Driedonks, T. A.; Dudek, A.; Elsharawy, A.; Floris, I.; Foers, A. D.; Gartner, K.; Garg, A. D.; Geurickx, E.; Gettemans, J.; Ghazavi, F.; Giebel, B.; Kormelink, T. G.; Hancock, G.; Helmoortel, H.; Hill, A. F.; Hyenne, V.; Kalra, H.; Kim, D.; Kowal, J.; Kraemer, S.; Leidinger, P.; Leonelli, C.; Liang, Y.; Lippens, L.; Liu, S.; Lo Cicero, A.; Martin, S.; Mathivanan, S.; Mathiyalagan, P.; Matusek, T.; Milani, G.; Monguio-Tortajada, M.; Mus, L. M.; Muth, D. C.; Nemeth, A.; Nolte-'t Hoen, E. N.; O'Driscoll, L.; Palmulli, R.; Pfaffl, M. W.; Primdal-Bengtson, B.; Romano, E.; Rousseau, Q.; Sahoo, S.; Sampaio, N.; Samuel, M.; Scicluna, B.; Soen, B.; Steels, A.; Swinnen, J. V.; Takatalo, M.; Thaminy, S.; Thery, C.; Tulkens, J.; Van Audenhove, I.; van der Grein, S.; Van Goethem, A.; van Herwijnen, M. J.; Van Niel, G.; Van Roy, N.; Van Vliet, A. R.; Vandamme, N.; Vanhauwaert, S.; Vergauwen, G.; Verweij, F.; Wallaert, A.; Wauben, M.; Witwer, K. W.; Zonneveld, M. I.; De Wever, O.; Vandesompele, J.; Hendrix, A., EV-TRACK: transparent reporting and centralizing knowledge in extracellular vesicle research. *Nat Methods* **2017**, *14* (3), 228-232.
9. Witwer, K. W.; Buzas, E. I.; Bemis, L. T.; Bora, A.; Lasser, C.; Lotvall, J.; Nolte-'t Hoen, E. N.; Piper, M. G.; Sivaraman, S.; Skog, J.; Thery, C.; Wauben, M. H.; Hochberg, F., Standardization of sample collection, isolation and analysis methods in extracellular vesicle research. *J Extracell Vesicles* **2013**, *2*.
10. Jeurissen, S.; Vergauwen, G.; Van Deun, J.; Lapeire, L.; Depoorter, V.; Miinalainen, I.; Sormunen, R.; Van den Broecke, R.; Braems, G.; Cocquyt, V.; Denys, H.; Hendrix, A., The isolation of morphologically intact and biologically active extracellular vesicles from the secretome of cancer-associated adipose tissue. *Cell Adh Migr* **2017**, *11* (2), 196-204.
11. Takov, K.; Yellon, D. M.; Davidson, S. M., Comparison of small extracellular vesicles isolated from plasma by ultracentrifugation or size-exclusion chromatography: yield, purity and functional potential. *J Extracell Vesicles* **2019**, *8* (1), 1560809.
12. Witwer, K. W.; Buzas, E. I.; Bemis, L. T.; Bora, A.; Lasser, C.; Lotvall, J.; Nolte-'t Hoen, E. N.; Piper, M. G.; Sivaraman, S.; Skog, J.; Thery, C.; Wauben, M. H.; Hochberg, F., Standardization of sample collection, isolation and analysis methods in extracellular vesicle research. *J Extracell Vesicles* **2013**, *2* (1), 20360.
13. Issadore, D.; Min, C.; Liang, M.; Chung, J.; Weissleder, R.; Lee, H., Miniature magnetic resonance system for point-of-care diagnostics. *Lab on a chip* **2011**, *11* (13), 2282-7.

- 23 14. Shao, H.; Chung, J.; Balaj, L.; Charest, A.; Bigner, D. D.; Carter, B. S.; Hochberg, F. H.; Breakefield, X. O.;  
24 Weissleder, R.; Lee, H., Protein typing of circulating microvesicles allows real-time monitoring of glioblastoma therapy.  
25 *Nat Med* **2012**, *18* (12), 1835-40.
- 26 15. Shao, H.; Yoon, T. J.; Liong, M.; Weissleder, R.; Lee, H., Magnetic nanoparticles for biomedical NMR-based  
27 diagnostics. *Beilstein J Nanotech* **2010**, *1*, 142-54.
- 28 16. van der Pol, E.; Coumans, F.; Varga, Z.; Krumrey, M.; Nieuwland, R., Innovation in detection of microparticles  
29 and exosomes. *J Thromb Haemost* **2013**, *11 Suppl 1*, 36-45.
- 30 17. van der Pol, E.; de Rond, L.; Coumans, F. A. W.; Gool, E. L.; Boing, A. N.; Sturk, A.; Nieuwland, R.; van  
31 Leeuwen, T. G., Absolute sizing and label-free identification of extracellular vesicles by flow cytometry. *Nanomedicine*  
32 **2018**, *14* (3), 801-810.
- 33 18. van der Pol, E.; Hoekstra, A. G.; Sturk, A.; Otto, C.; van Leeuwen, T. G.; Nieuwland, R., Optical and non-optical  
34 methods for detection and characterization of microparticles and exosomes. *J Thromb Haemost* **2010**, *8* (12), 2596-607.
- 35 19. Gasecka, A.; Nieuwland, R.; Budnik, M.; Dignat-George, F.; Eyileten, C.; Harrison, P.; Lacroix, R.; Leroyer,  
36 A.; Opolski, G.; Pluta, K.; van der Pol, E.; Postula, M.; Siljander, P.; Siller-Matula, J. M.; Filipiak, K. J., Ticagrelor  
37 attenuates the increase of extracellular vesicle concentrations in plasma after acute myocardial infarction compared to  
38 clopidogrel. *J Thromb Haemost* **2020**, *18* (3), 609-623.
- 39 20. Zhu, S.; Ma, L.; Wang, S.; Chen, C.; Zhang, W.; Yang, L.; Hang, W.; Nolan, J. P.; Wu, L.; Yan, X., Light-  
40 scattering detection below the level of single fluorescent molecules for high-resolution characterization of functional  
41 nanoparticles. *Acs Nano* **2014**, *8* (10), 10998-1006.
- 42 21. Nolan, J. P.; Jones, J. C., Detection of platelet vesicles by flow cytometry. *Platelets* **2017**, *28* (3), 256-262.
- 43 22. van der Vlist, E. J.; Nolte-'t Hoen, E. N.; Stoorvogel, W.; Arkesteijn, G. J.; Wauben, M. H., Fluorescent labeling  
44 of nano-sized vesicles released by cells and subsequent quantitative and qualitative analysis by high-resolution flow  
45 cytometry. *Nature protocols* **2012**, *7* (7), 1311-26.
- 46 23. Nolte-'t Hoen, E. N.; van der Vlist, E. J.; Aalberts, M.; Mertens, H. C.; Bosch, B. J.; Bartelink, W.;  
47 Mastrobattista, E.; van Gaal, E. V.; Stoorvogel, W.; Arkesteijn, G. J.; Wauben, M. H., Quantitative and qualitative flow  
48 cytometric analysis of nanosized cell-derived membrane vesicles. *Nanomedicine* **2012**, *8* (5), 712-20.
- 49 24. de Rond, L.; van der Pol, E.; Hau, C. M.; Varga, Z.; Sturk, A.; van Leeuwen, T. G.; Nieuwland, R.; Coumans,  
50 F. A. W., Comparison of Generic Fluorescent Markers for Detection of Extracellular Vesicles by Flow Cytometry. *Clinical*  
51 *chemistry* **2018**, *64* (4), 680-689.
- 52 25. Welsh, J. A.; Van Der Pol, E.; Arkesteijn, G. J. A.; Bremer, M.; Brisson, A.; Coumans, F.; Dignat-George, F.;  
53 Duggan, E.; Ghiran, I.; Giebel, B.; Gorgens, A.; Hendrix, A.; Lacroix, R.; Lannigan, J.; Libregts, S.; Lozano-Andres,  
54 E.; Morales-Kastresana, A.; Robert, S.; De Rond, L.; Tertel, T.; Tigges, J.; De Wever, O.; Yan, X.; Nieuwland, R.;  
55 Wauben, M. H. M.; Nolan, J. P.; Jones, J. C., MIFlowCyt-EV: a framework for standardized reporting of extracellular  
56 vesicle flow cytometry experiments. *J Extracell Vesicles* **2020**, *9* (1), 1713526.
- 57 26. Lai, C. P.; Kim, E. Y.; Badr, C. E.; Weissleder, R.; Mempel, T. R.; Tannous, B. A.; Breakefield, X. O.,  
58 Visualization and tracking of tumour extracellular vesicle delivery and RNA translation using multiplexed reporters. *Nat*  
59 *Commun* **2015**, *6*, 7029.
- 60 27. Morales-Kastresana, A.; Telford, B.; Musich, T. A.; McKinnon, K.; Clayborne, C.; Braig, Z.; Rosner, A.;  
61 Demberg, T.; Watson, D. C.; Karpova, T. S.; Freeman, G. J.; DeKruyff, R. H.; Pavlakis, G. N.; Terabe, M.; Robert-  
62 Guroff, M.; Berzofsky, J. A.; Jones, J. C., Labeling Extracellular Vesicles for Nanoscale Flow Cytometry. *Sci Rep* **2017**, *7*  
63 (1), 1878.
- 64 28. Welsh, J. A.; Horak, P.; Wilkinson, J. S.; Ford, V. J.; Jones, J. C.; Smith, D.; Holloway, J. A.; Englyst, N. A.,  
65 FCMPASS Software Aids Extracellular Vesicle Light Scatter Standardization. *Cytometry A* **2020**, *97* (6), 569-581.
- 66 29. Welsh, J. A.; Jones, J. C.; Tang, V. A., Fluorescence and Light Scatter Calibration Allow Comparisons of Small  
67 Particle Data in Standard Units across Different Flow Cytometry Platforms and Detector Settings. *Cytometry A* **2020**, *97*  
68 (6), 592-601.
- 69

70

71

## Figure 1

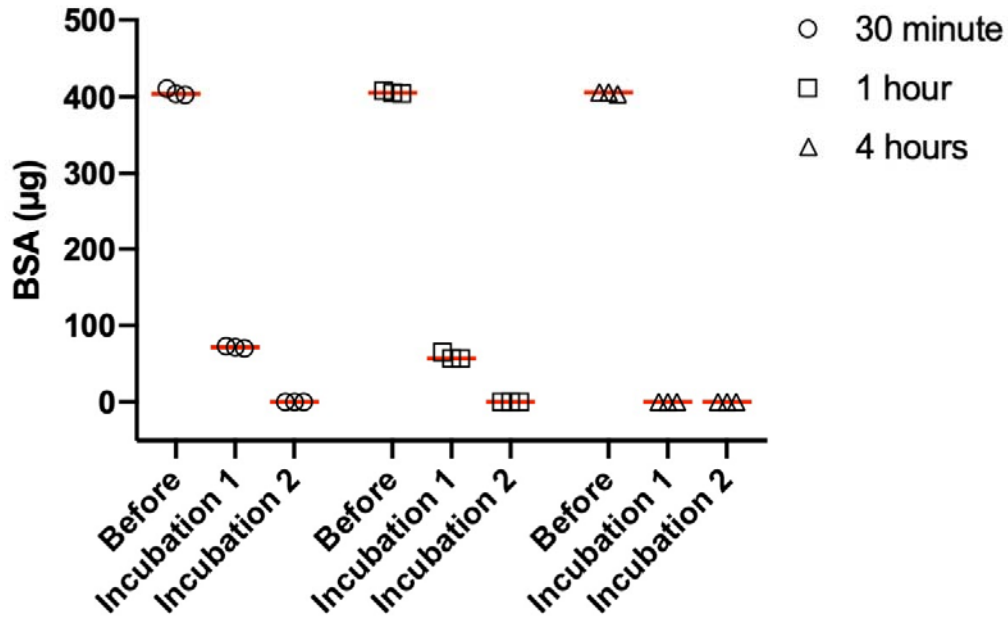

72

73

74

75

**Figure 1. BSA removal using EV-Clean.** The removal of 75 µL purified bovine serum albumin (BSA) using an initial incubation with 100 µL EV-Clean for either 30 minutes, 1 hour, or 4 hours followed by a 30 minute incubation with EV-clean.

## Figure 2

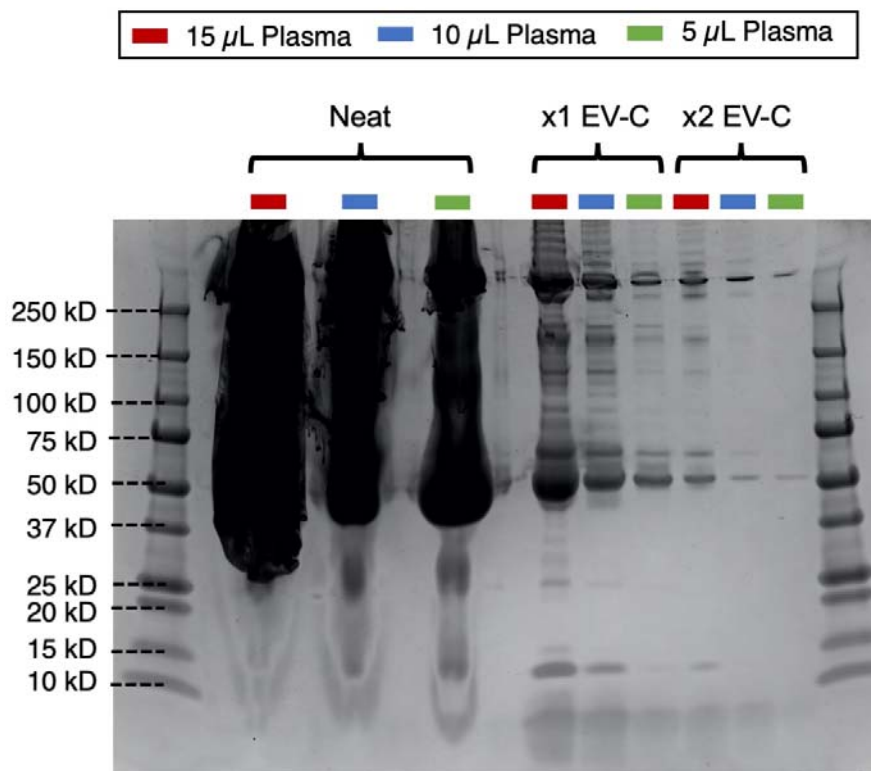

76

77

**Figure 2. Protein removal from plasma.** The ability of EV-Clean to remove protein from plasma was tested using 15  $\mu$ L

78

(red), 10  $\mu$ L (blue), and 5  $\mu$ L (green) of neat platelet-depleted plasma with EV-Clean for one incubation and two

79

incubations for 30 minutes.

### Figure 3

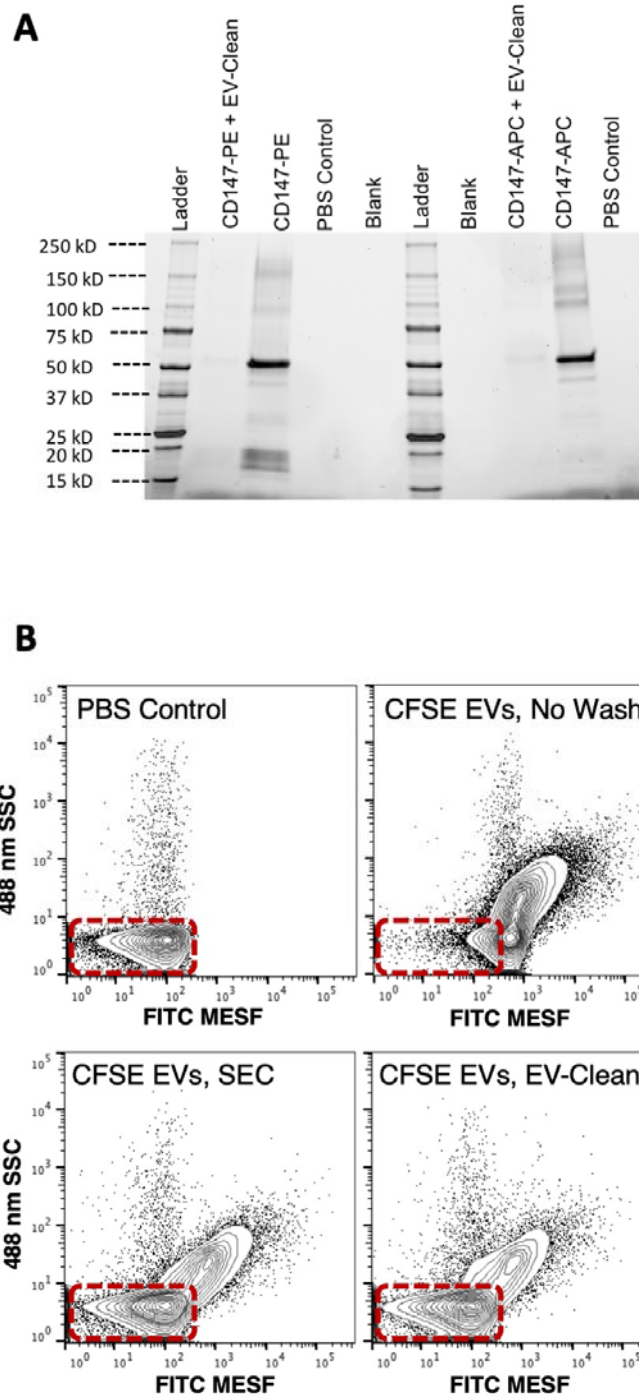

**Figure 3. Fluorescent label removal.** The ability of EV-Clean to remove fluorescent labels was tested using 1  $\mu\text{g}$  of IgG antibodies conjugated to large fluorophores; phycoerythrin (PE) and allophycocyanin (APC). A comparison of EV detectability from background signal was investigated. DC2.4 EVs were detected using flow cytometry with samples stained with 20  $\mu\text{M}$  of CFDA-SE with no purification (C-top right), stained and the purified used size exclusion chromatography (C-bottom left), and stained and purified using EV-Clean (C-bottom right). A buffer only control to represent the true background noise of the instrument is also shown (C-top left)

**Figure 4**

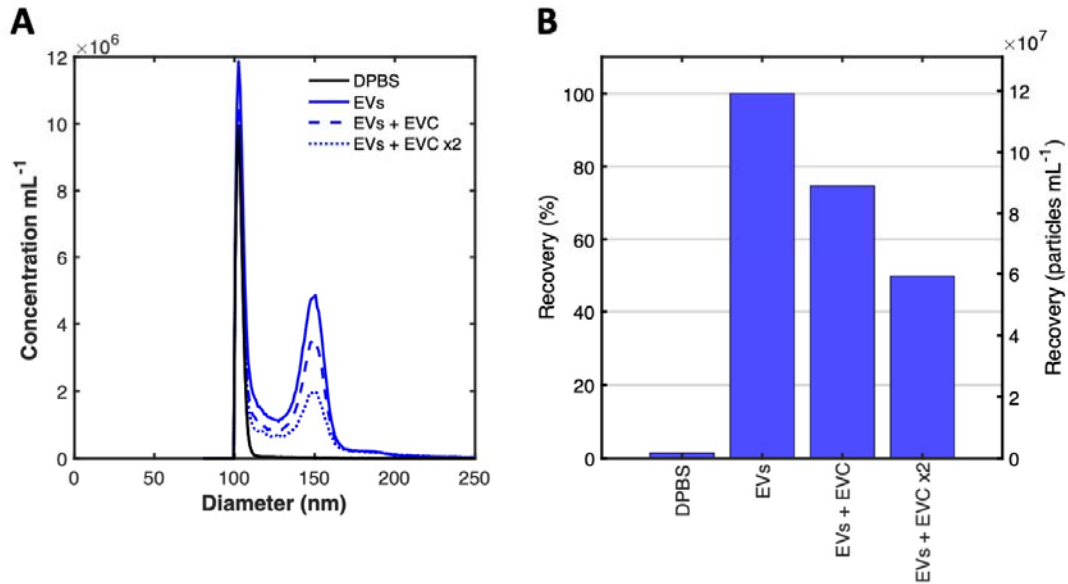

387

388 **Figure 4. Affect of EV-clean on EV recovery.** The influence of different permutation of EV-clean on  
389 detectable EV recovery was assessed using flow cytometry (A). The percentange recovery of EVs gated  
390 from 115-200 nm using EV-Clean and incubated once or twice for 30 minutes was assessed (B).
